1 **The macroecology of passerine nest types, in the light of macroevolution**

2 Jay P. McEntee<sup>1\*</sup>, Zoe Zelazny<sup>1</sup>, and J. Gordon Burleigh<sup>1</sup>

3 <sup>1</sup>Department of Biology, University of Florida, Gainesville, FL 32611, USA

4 \*Email for correspondence: jaymcentee@ufl.edu

5

6 **Running title:** Macroecology of passerine nests

7

8 **Keywords:** Evolution, behavior, function, predation, thermoregulation, macroecology,  
9 trait macroevolution

10

11 **Statement of authorship:** JPM and JGB designed the study. JPM and ZZ compiled  
12 data from the literature. JPM performed statistical analyses with input from JGB. JPM  
13 and JGB wrote the manuscript, and ZZ contributed to revisions.

14

15 **Data accessibility statements:** Data were obtained from existing sources in the  
16 literature, cited in the manuscript.

17 **Figures:** 4

18 **Tables:** 6

19 **Words in abstract:** 146

20 **Words in main text:** 6,126

21 **References:** 71

22

23

24

25

26

27

28

29

30

31

32

33 **Abstract:**

34  
35 Passerine birds build a diversity of nests to lay and incubate eggs, and to house nestlings.  
36 Open cup, dome, and hole (or cavity) nests have distinct advantages and/or disadvantages  
37 related to predation risk and thermoregulation. We used macroecological and  
38 macroevolutionary approaches to test contrasting predictions from considering these  
39 consequences. Patterns of prevalence across latitude and elevation for the roofed nest  
40 types (holes and domes) provide no evidence that their thermoregulation benefits promote  
41 colonization of colder environments. These patterns are more consistent with the role of  
42 predation in determining where dome-nesting species in particular occur.  
43 Macroevolutionary analyses suggest that diversity patterns for nest types along major  
44 ecological gradients mostly arise from how clades with conserved nest types have  
45 diversified across gradients, rather than arising from local adaptation. Lastly, we reveal a  
46 negative relationship between body mass and latitude in hole-nesting passerines, which  
47 runs counter to Bergmann's rule.

48  
49 **Introduction:**

50  
51 Across animal diversity, many species construct nests, modifying their  
52 environments to carry out particular activities. The passerine birds, members of the order  
53 Passeriformes, are among the most familiar nest-builders. The great majority of passerine  
54 species build nests in which they lay and incubate eggs, and subsequently house altricial  
55 nestlings (Hansell 2000). Some passerines additionally use nests for roosting (Kendeigh  
56 1961), although this behavior is far less widespread across diversity. The diversity of nest  
57 sites, construction materials, and architecture among passerines has made this group a  
58 preferred study system for the ecology and evolution of nest building (Collias & Collias  
59 1984; Collias 1997; Hansell 2000; Price & Griffith 2017).

60 While there is great diversity in nest forms and sites among passerine species, a  
61 number of authors have categorized passerine nests into three basic types: hole/cavity  
62 nests (hereafter hole nests), dome nests, and open cup nests (Wallace 1868; Studer 1994;  
63 Martin 1995; Collias 1997; Martin *et al.* 2017). Both hole and dome nests are roofed nests,  
64 distinct from open cup nests, which are open above. Whereas hole nests are constructed

65 within some existing roofed structure, dome nests are constructed in the open. The two  
66 primary functions of passerine nests are thought to be protection from predation and  
67 thermoregulation. Roofed nests are thought to be advantageous in both respects (Nice  
68 1957; Collias & Collias 1984; Lamprecht & Schmolz 2004; Auer *et al.* 2007; Martin *et al.*  
69 2017) The advantages of open cup nests may be that they are less time-consuming or less  
70 energetically expensive to construct (Mainwaring & Hartley 2013).

71 The consensus from the literature appears to be that hole nests have the lowest  
72 predation rates of the three nest types (Nice 1957; von Haartman 1957; Skutch 1966;  
73 Ricklefs 1969; Collias & Collias 1984; Oniki 1985; Martin & Li 1992; Martin 1993, 1995;  
74 Auer *et al.* 2007), with dome nests generally having lower predation rates than open cup  
75 nests (Oniki 1979; Linder & Bollinger 1995; Auer *et al.* 2007; Martin *et al.* 2017). The  
76 relatively longer developmental periods of eggs and nestlings in roofed-nesting species  
77 have been viewed as evidence of adaptive evolution to lower predation rates, with open  
78 cup nesting species forced to shorten development periods because of high predation rates  
79 (Martin 1993, 1995).

80 Evidence indicates that some roofed nests aid nest inhabitants by providing greater  
81 thermoregulatory benefits, with temperatures inside roofed nest buffered relative to  
82 external temperatures (Lamprecht & Schmolz 2004). Roofed nests might further provide  
83 protection from damaging insolation (Collias 1964) and precipitation (Collias & Collias  
84 1984). These thermoregulatory benefits reduce the amount of energy consumed in  
85 thermoregulation (Kendeigh 1961; Buttemer *et al.* 1987), potentially benefitting roofed  
86 nesting species in many different environments. The roosting of passerines in hole  
87 (Kendeigh 1961) and domed nests (Skutch 1961; Buttemer *et al.* 1987) during cold nights  
88 outside the breeding season provides stark evidence for the thermoregulatory benefits of  
89 enclosed nests in cold environments. By comparison, non-breeding season roosting in nests  
90 is exceedingly rare among open cup-nesting species (Skutch 1961). The smaller body size  
91 of dome-nesting passerines, in contrast to both hole- and open cup-nesting passerines, has  
92 further been claimed as evidence for the thermoregulation benefits of domed nests in cold  
93 environments (Collias & Collias 1984; Martin *et al.* 2017), as smaller-bodied animals lose  
94 heat more rapidly (Calder 1983).

95           The relative advantages of roofed nests in terms of predation and thermoregulation  
96 yield predictions about where roofed-nesting species should be most prevalent along  
97 environmental gradients. Evidence generally indicates that nest predation rates are higher  
98 at tropical latitudes (Ricklefs 1969; Oniki 1985) and possibly in the southern temperates  
99 (Martin 1996; Martin *et al.* 2017), as compared to higher latitudes and the northern  
100 temperates. If nest predation rates help determine the geographic ranges of species, we  
101 predict that both hole- and dome-nesting species should be relatively more prevalent at  
102 lower latitudes. Thermoregulatory pressures could yield a number of different latitudinal  
103 patterns, but we focus on one prediction here: the ability of enclosed nests to slow heat loss  
104 for eggs and altricial, featherless nestlings suggests they should be especially helpful in cold  
105 environments where ambient temperatures are far below the temperatures necessary for  
106 egg development. Thus, we expect that enclosed nests should be relatively more prevalent  
107 at extremely high latitudes where the warmest seasons are still cold. Comparisons of  
108 community-level data have reported higher frequencies of dome-nesting at low latitudes  
109 and in the southern hemisphere (Auer *et al.* 2007; Martin *et al.* 2017), consistent with the  
110 expectations from nest predation rates, and not with thermoregulation pressures.  
111 Latitudinal trends in hole-nesting are less frequently reported in the literature, although  
112 some evidence suggests that passerine hole-nesting is less frequent in tropical forest than  
113 in the northern temperates (Ricklefs 1969), consistent with expectations from  
114 thermoregulation pressures. Barve and Mason (2015), however, found no correlation  
115 between cold breeding conditions and the evolution of cavity nesting in the Muscicapidae  
116 using phylogenetic logistic regression.

117           Existing evidence consistently shows that predation rates decrease with elevation in  
118 the tropics (Skutch 1985, Boyle 2008, Jankowski et al. 2013). Jankowski et al. (2013)  
119 hypothesized that relaxed predation pressures at higher tropical elevations might lead to  
120 the evolution of life history characteristics unsuitable for high predation pressures at lower  
121 elevations. If predation rates are consistently higher in open cup nests relative to hole and  
122 dome nests (Nice 1957; Snow 1978; Oniki 1985; Hall *et al.* 2015; Martin *et al.* 2017), nest  
123 types could evolve under these dynamics, leading to high frequencies of cup nests at high  
124 elevations. Alternatively, if the thermoregulatory demands of high-elevation environments  
125 are more important than predation in shaping the nest type use across elevations, we

126 would predict that enclosed nests (dome and hole nests) should attain high frequencies at  
127 higher elevations. This should be especially true in the tropics, where temperature  
128 differences at different elevations are more consistent across annual cycles (Janzen 1967;  
129 Londoño *et al.* 2017) – i.e. there are no warm seasons at >3000m elevation that allow  
130 species to nest at temperatures similar to the balmy lowlands. Thus, elevation within the  
131 tropics should be a more consistent proxy for breeding temperatures than latitude. To our  
132 knowledge, little previous work has explored variation in passerine nest type frequency  
133 along elevational gradients. However, intraspecific variation in nest material, construction,  
134 and placement consistent with adaptation to cold temperatures in the Hawaiian  
135 honeycreeper *Hemignathus virens* have been found (Kern & Van Riper III 1984).

136 Nest type patterns along gradients could result primarily from adaptation to  
137 environmental conditions if nest type is labile, or primarily from the differential  
138 diversification of clades dominated by different nest types if nest type is conserved. To  
139 investigate which of these mechanisms is responsible for the nest type patterns we see, we  
140 must reconstruct the evolutionary history of these nest types across the passerines. While  
141 behavioral traits have often been considered to be especially labile (Darwin 1874;  
142 Blomberg *et al.* 2003), a recent analysis indicated that passerine nest type may not be  
143 (Price & Griffith 2017).

144 To further contextualize the evolution of passerine nest types, we examined the  
145 association of nest types with body size evolution. Body size is thought to be associated  
146 with different nest predation rates, with larger birds suffering higher nest predation rates  
147 (Brightsmith 2005), and thermoregulatory pressures, where heat loss is a greater concern  
148 for smaller species (Calder 1983). Collias and Collias (1984) suggested that the small size  
149 of dome-nesting species provides support for the importance of thermoregulation and/or  
150 protection from abiotic environment in roofed nests, and that these thermoregulatory  
151 benefits could be especially important in cold environments at high latitudes. Dome-  
152 nesting species have been found to be consistently smaller than open cup-nesting species  
153 in community-level analyses across regions (Martin *et al.* 2017), evidence viewed as  
154 indirect support for the thermoregulation functions of domed nests given that heat loss  
155 increases with surface:volume ratios.

156

## 157 **Methods**

### 158 *Nest type scoring and data set*

159 We scored nest types for the 4,373 passerine species whose nest type or nesting  
160 behavior was adequately described to assign a score in the Handbook of the Birds of the  
161 World Alive (del Hoyo *et al.* 2015, last accessed 30 June 2016, hereafter HBW Alive). These  
162 4,373 species represented 74.0% of the 5,912 passerine species in the HBW Alive  
163 taxonomy. We categorized 96.6% of these species' nests as open cup, domed, or hole (we  
164 use the term "hole" to refer to any nest built inside a tree cavity, rock crevice, or earthen  
165 bank). In distinguishing between open cup and domed nests in ambiguous cases, as for  
166 nests described as 'purses', we scored nests as 'open cup' where descriptions or  
167 photographs indicated that nests are exposed above. In cases where nests described as  
168 "purses" have side entrances and are not open above, they were scored as "domed." We  
169 scored nests described as "partially domed" as "domed." The remaining 3.4% of the species  
170 were scored either as nesting in more than one nest type category or as brood parasites,  
171 which do not construct a nest or incubate eggs. We refer to the data set that includes all  
172 4,373 species as the "all species" data set.

### 173 *Phylogeny*

174 In order to account for the history of nest type evolution in our macroecological  
175 analyses, we reconstructed the history of nest type transitions across the passerine  
176 phylogeny. For this purpose, we used the topology of the supermatrix phylogenetic tree of  
177 Burleigh *et al.* (2015). We transformed the branch lengths to be ultrametric by performing  
178 a penalized likelihood analysis with r8s v. 1.71 (Sanderson 2003). The size of the  
179 phylogenetic tree rendered a more complex Bayesian approach, e.g. BEAST (Drummond &  
180 Rambaut 2007) computationally infeasible. The branch lengths were calibrated using  
181 twenty fossil calibrations from throughout the avian phylogeny (Baiser *et al.* 2017). The  
182 optimal smoothing parameter was estimated in r8s via a cross-validation analysis. For this  
183 analysis, the age of crown Psittacopasserae was fixed to 60 million years, midway between  
184 the minimum (53.5 my) and maximum (66.5 my) estimated ages. We determined the  
185 optimal smoothing parameter by checking how closely the unconstrained fossil age  
186 estimates matched their fossil-constrained age estimates, resulting in an optimal

187 smoothing parameter of 3.2. We then trimmed the phylogenetic tree so that it included  
188 only the Passeriformes.

189 Ancestral state reconstruction required taxonomic reconciliation between the trait  
190 data set (del Hoyo *et al.* 2015, last accessed 30 June 2016) and phylogenetic tree (Clements  
191 *et al.* 2011; Burleigh *et al.* 2015). We identified potentially mismatched taxa using the  
192 name.check function from the R package geiger (Harmon *et al.* 2008). We examined all  
193 cases where a species in the Burleigh *et al.* (2015) phylogenetic tree did not have a  
194 corresponding species with the exact same name in the data set using the HBW Alive  
195 taxonomy. We examined the taxonomic history for these species in Avibase  
196 (<https://avibase.bsc-eoc.org/avibase.jsp?lang=EN>), and changed the species name to  
197 match the Burleigh *et al.* (2015) phylogenetic tree when an alternate species name  
198 matched a taxon name from the HBW Alive taxonomy. Many of these cases involved either  
199 the use of different genus names or alternate spellings. Taxa treated as subspecies in the  
200 HBW Alive (2015) taxonomy and species in Burleigh *et al.* (2015) were not included in our  
201 analyses.

202 There were 3,242 passerine species with nest descriptions that could be matched to  
203 the tips in the Burleigh *et al.* (2015) phylogenetic tree (hereafter the “parsimony” data set).  
204 These included species scored as using only one of the three nest type categories (hole, cup,  
205 and dome), as well as species nesting in more than one nest type (hole or cup, hole or  
206 dome, cup or dome), and brood parasites. We believe that estimating the transition rates  
207 among the seven nest types using maximum likelihood methods is unwise, as some  
208 transitions are too rare to justify rate estimation. Thus, we performed parsimony ancestral  
209 state reconstruction for the parsimony data set, using the Most Parsimonious  
210 Reconstruction (MPR) algorithm in the R package ape for this data set. We then limited the  
211 data set to the 3,112 species nesting in only one type among hole, cup, or dome nests  
212 (hereafter the “likelihood” data set). We estimated transition rates among the three nest  
213 types by maximum likelihood under four different rate models (Pagel 1994; Paradis *et al.*  
214 2004), and used AIC values to compare models. We estimated ancestral states using the  
215 make.simmap function in the R package phytools (Revell 2012) under the “all-rates-  
216 different” (ARD) model, which was preferred by AIC.

217

218 *Species ranges*

219 We downloaded the BirdLife International/NatureServe (NatureServe 2014) range  
220 maps for passerine species on September 18, 2015, and examined latitudinal variation  
221 among species ranges using R 3.3.3 {{331 Core 2012;}}. To prevent errors from invalid  
222 geometries in species ranges, we first cleaned breeding range polygons by polygonation  
223 using the function `clgeo_Clean` (package `cleangeo` 0.2-2,  
224 <https://github.com/eblondel/cleangeo>). We then calculated the centroid of the breeding  
225 range using the function `gCentroid` (package `rgeos` 0.3-23 [http://r-forge.r-](http://r-forge.r-project.org/projects/rgeos/)  
226 [project.org/projects/rgeos/](http://r-forge.r-project.org/projects/rgeos/)).

227 For elevation analyses, we limited our species data set to the 874 passerine species  
228 in our “PGLM” data set (see below) whose range centroids were within 23.433°S and  
229 23.433°N and -30° and -130°W, and whose elevational range could be estimated with our  
230 data set. This data set is hereafter referred to as the “Neotropical passerine” data set. We  
231 calculated the median elevation for each species’ breeding range by first subsetting a digital  
232 elevation model (DEM) by the shape of the breeding range, resulting in a DEM with the  
233 same limits as the breeding range. We then calculate the median elevation of the pixels  
234 across the entirety of the breeding range, using the `cellStats` function in the R package  
235 *raster* 2.5-8. To obtain a DEM covering all of the western hemisphere, we combined  
236 country-level DEMs available through the *raster* function `getData` (also available at:  
237 <http://www.diva-gis.org/gdata>). These DEMs are aggregated at a resolution of 30 seconds  
238 from a CGIAR SRTM 3-second resolution DEM (Reuter *et al.* 2007).

239

240 *Body mass data*

241 We associated body mass data from a large compendium of avian body masses  
242 (Dunning 2008, 2015) with the species that were in both our nesting data set and  
243 phylogeny. Where separate body mass estimates are made for males and females in this  
244 data set, we took the average of the male and female body mass. Taxonomic reconciliation  
245 was required to match some mass data with tips in the Burleigh *et al.* (2015) phylogeny,  
246 and to the nest data from the Handbook of the Birds of the World Alive and species range  
247 data. We reconciled names by checking for species names from the body mass data set  
248 without matches in the other data, and examining taxonomic history to check for synonyms



249 as above (see “Phylogeny” section). We matched body mass data and species range data  
250 with 2,754 of the 3,112 species in the “likelihood” data set, yielding a new data set which  
251 we refer to as the “PGLM” (phylogenetic generalized linear model) data set.

252

### 253 *Phylogenetic generalized linear models*

254 To analyze latitudinal and elevational variation in the probability of evolving  
255 different nest types, we used phylogenetic generalized linear models. We built simple  
256 models akin to logistic regression, and accounted for phylogenetic effects by modeling the  
257 evolution of nest type with a threshold model where an underlying continuous value  
258 evolves under Brownian motion. We ran different models for each nest type (hole, cup and  
259 dome) using the R package *phylolm* (Ho & Ane 2014). The response variable in each of  
260 these models was the nest type of interest versus all other nest types (e.g. dome-nesting  
261 versus not dome-nesting). We could not perform phylogenetic logistic regression with  
262 three response categories, representing each nest type, as it has not been implemented in  
263 the framework we used for analysis (Ho & Ane 2014). For latitudinal analyses, our full  
264 model included the absolute value of latitude, log body mass, and their interaction as  
265 predictors. For elevational analyses on the Neotropical passerine data set (minus 14  
266 species that did not have body masses reported: Dunning, 2008; Dunning, 2015), we built  
267 models with median elevation, log body mass, and their interaction as predictors.

268 We also investigated whether nest type and latitude (or elevation) predicts log body  
269 mass, instead of predicting nest type with log body mass. We performed this analysis  
270 because nest type is strongly conserved within lineages (Figure 1), and thus nest type may  
271 define evolutionary regimes for the evolution of log body mass, instead of responding to  
272 body mass and latitude (or elevation). For these analyses, we built phylogenetic  
273 generalized linear models with log body mass as the response variable, and with nest type  
274 and latitude (or elevation) and their interaction as predictors. These models allow us to  
275 contrast relationships of log body mass across ecological gradients within each nest type.  
276 We again implemented these models using *phylolm*. These models are built under the  
277 assumption that the evolution of log body mass is adequately described by an Ornstein-  
278 Uhlenbeck process (using the *OUrandomRoot* option in model calls).

279

## 280 **Results**

### 281 *Nest type prevalence*

282 In the “all species” data set comprising the 4,373 passerine species that could be  
283 scored for nest type or nesting behavior, 27 (0.62%) are brood parasites that do not  
284 construct a nest or incubate eggs. Of the species that construct a nest or incubate eggs  
285 (4,346 species), 560 (12.9%) are hole nesters, 2,546 (58.6%) are open cup nesters, and  
286 1,117 (25.7%) are dome nesters. The remaining 123 species are scored as nesting in more  
287 than one nest type: hole or cup, 65 species (1.5%); hole or dome, 17 species (0.39%); cup  
288 or dome, 41 species (0.94%).

289

### 290 *Ancestral state reconstructions*

291 Both maximum parsimony and maximum likelihood ancestral state reconstructions  
292 of nesting behavior show that the cup, dome, and hole nesting states are strongly  
293 conserved across most of the passerine phylogeny. Transitions among nest types are rare  
294 in both the maximum parsimony (Supplementary Information Figure 1) and maximum  
295 likelihood (Figure 1) reconstructions. Many large clades are dominated by a single nest  
296 type. Among the transition rate models in maximum likelihood reconstructions, the  
297 preferred model by AIC is the ARD (all-rates-different) model (Table 1). The transition  
298 rates in this model are low (see Table 2; all transition rate categories  $\leq 0.0104$  per million  
299 years while tree height = 56.9 million years).

300 Despite the relatively low frequency of dome and hole nesting among extant taxa,  
301 ancestral state reconstruction by maximum likelihood consistently finds that the most  
302 recent common ancestor (MRCA) of all extant passerine lineages nested in either domes or  
303 cavities (Figure 1). Our maximum likelihood results are consistent with those of (Price &  
304 Griffith 2017), in that we recovered a nest type other than open cup as the state of the  
305 MRCA of the extant passerines. Meanwhile, the nest type state of the MRCA of the extant  
306 passerines in ancestral state reconstruction by maximum parsimony is more ambiguous  
307 (Supporting Figure 1), with all nest types possible in the two most basal nodes.

308 Our results suggest that the rarity of ‘roofed’ (hole and dome) nests as compared to  
309 open cup nests can be explained in part by transition rate biases that favor transitions to  
310 open cup nesting. Our estimated transition rates in maximum likelihood analyses are

311 highly asymmetric between hole- and cup-nests, with the hole to cup rate nearly an order  
312 of magnitude higher than the cup to hole rate (0.010 transitions versus 0.0012 transitions  
313 per million years, respectively, Table 2). Similarly, transitions to open cup nesting from  
314 dome nesting were estimated to occur at a ~25% higher rate than the reverse (Table 2).

315

#### 316 *Nest type by latitude*

317 Under the hypothesis that roofed nests gain thermoregulatory benefits through  
318 slower heat dissipation from nest contents (eggs, nestlings, and/or the incubating adult),  
319 we predicted that roofed nests should disproportionately be found at high latitudes, where  
320 nest contents are more likely to be subjected to colder weather. However, the latitudinal  
321 pattern of nest use among species runs counter to this prediction (Figure 2 and  
322 Supplementary Figure 2). Dome-nesting species are predominantly found at low latitudes  
323 (Figure 2; see also Collias and Collias 1984, Auer *et al.* 2007, Martin *et al.* 2017). Assuming  
324 that predation rates are higher at low latitudes (Skutch 1985), the prevalence of dome-  
325 nesting species at low latitudes is more consistent with predictions from predation rate  
326 variation across latitudes (Martin 1995). There is a steep decline in species diversity of  
327 dome-nesting passerines at ~35° latitude compared to the diversity at lower latitudes  
328 (Figure 2, Supplementary Figure 2). In contrast to dome-nesting species, the relative  
329 prevalence of hole-nesting across species appears to have a subtle mid-latitude peak  
330 (Figure 2). In the northern hemisphere especially, moderate levels of hole-nesting species  
331 diversity are maintained past 40° N (Supplementary Figure 2). The proportion of species  
332 range centroids belonging to hole-nesting species appears highest near 40° N, although  
333 these proportions are fairly flat across latitude (Figure 2).

334 In phylogenetic generalized linear models built to investigate whether latitude and  
335 body mass influence the evolution of cup-, dome-, and hole-nesting, intercept-only models  
336 were preferred for all three nest types by AIC (Table 3). This result indicates that neither  
337 latitude nor body mass is predictive of the evolution of the three different passerine nest  
338 type categories used in this study.

339

#### 340 *Nest type by elevation*

341 In the Neotropical species data set, there are no clear patterns of nest type  
342 prevalence with elevation. However, the great majority of Neotropical species ranges have  
343 low median elevations (<1000 m), such that the species diversity of all Neotropical  
344 passerine species is low at high elevation. High-elevation species diversity is especially low  
345 in the dome- and hole-nesting species (Figure 3a). Thus, range analyses did not provide  
346 evidence that either dome or hole nests are disproportionately prevalent at higher  
347 elevations in the Neotropics.

348 In candidate sets of phylogenetic generalized linear models built to test for the  
349 combined effects of elevation and body mass on the evolution of nest type, the preferred  
350 models by AIC for open cup-nesting and dome-nesting included only elevation as a  
351 predictor (Table 4). In the cup-nesting model, the probability of evolving cup-nesting  
352 increases slightly with median elevation (Table 5). However, the confidence intervals  
353 around the elevation parameter estimate, obtained from bootstrapping (Ho & Ane 2014),  
354 include zero. In the dome-nesting model, the probability of evolving dome-nesting  
355 decreases slightly with median elevation. The confidence intervals around the median  
356 elevation parameter again include zero in the dome-nesting model. The point estimates for  
357 the effect of median elevation in these models are consistent with expectations from the  
358 predation hypothesis, and inconsistent with expectations from the thermoregulation  
359 hypothesis. However, due to the uncertainty around the parameter estimates, these results  
360 should not be viewed as especially strong evidence for the correlations that should arise  
361 under the hypothesis that nest predation rates influence geographic ranges of the different  
362 nest types. For hole-nesting, the intercept-only model was preferred by AIC (Table 4).

363

#### 364 *Predicting body mass by nest type and ecological gradients*

365 In phylogenetic generalized linear models examining the evolution of body mass by  
366 nest type and latitude, the full model was preferred by AIC (Table 6). Visualization of the  
367 model results shows a complex pattern. Overall, dome-nesting species are smaller than  
368 both open cup- and hole-nesting species, consistent with previous evidence (Collias 1997;  
369 Martin *et al.* 2017). The most pronounced body mass differences by nest type are those  
370 between hole- and dome-nesting species in the tropics: hole-nesting species are  
371 approximately 2.3 times as large as dome-nesting species at the equator on average (based

372 on expected values from phylogenetic GLM). While the body masses of cup- and dome-  
373 nesting species vary little with latitude, the body masses of hole-nesting species decline  
374 with latitude. The negative relationship of log body mass with latitude runs counter to the  
375 among-species interpretation of Bergmann's rule (Olson *et al.* 2009), under which we  
376 expect a positive relationship.

377 In phylogenetic generalized linear models examining the evolution of body mass by  
378 nest type and median elevation in neotropical passerines, the preferred model was the  
379 intercept-only model (Table 6). Thus, despite the negative relationship between log body  
380 mass and latitude found among cavity-nesting species, our study provides no evidence for a  
381 similar negative relationship between log body mass and elevation among hole-nesting  
382 species.

## 383 **Discussion**

### 384 *Macroevolutionary dynamics of passerine nest types*

385 Our combined macroevolutionary and macroecological analyses underscore the  
386 importance of evolutionary history in explaining the distribution of behavioral traits along  
387 ecological gradients. Associations of nest types with particular environments could arise  
388 from local adaptation if nest types can readily evolve to different environments.  
389 Alternatively, these associations could arise as an epiphenomenon, where clades  
390 dominated by particular nest types diversify at different rates at different places along  
391 latitudinal or elevational gradients. Our ancestral state reconstructions indicate that nest  
392 type states are generally conserved across the passerine phylogeny. Thus, the  
393 macroecological patterns of nest types are more likely a product of these  
394 macroevolutionary dynamics than resulting from local adaptation along gradients.

395 Although estimated transition rates between nest types were low (Table 4), the  
396 highest estimated rates of change were in hole-nesting lineages. This rate (< one per 50  
397 million years per lineage) is low relative to what would be expected from regular nest type  
398 transitions via local adaptation, but it is noteworthy that hole-nesting species have the  
399 highest rates of transition among the nest types, as previous authors have hypothesized  
400 that hole nesting might constrain lineages from transitioning to other nest types (Collias &  
401 Collias 1984). The lowest rates of change (< one per 200 million years per-lineage) were in  
402

403 open cup-nesting species. Corresponding with these low transition rates, the evolutionary  
404 origin of nest type for most passerine species is ancient: ~97% of species in our data set  
405 trace the origin of their nest type back further than 10 million years (Figures 1 and 4).  
406 Open-cup nesting species in particular appear to have ancient origins for their nest types  
407 (Figure 4). While there are a few clades comprising tens of species that exhibit multiple  
408 transitions (e.g. the families Icteridae (Drury & Burroughs 2015), Muscicapidae (Barve &  
409 Mason 2015), Furnariidae (Zyskowski & Prum 1999; Irestedt *et al.* 2006), Timaliidae (Hall  
410 *et al.* 2015)), several large clades exhibit uniformity, or near-uniformity, in nest type.

411 Some previous studies (Snow 1978; Price & Griffith 2017) have interpreted the  
412 evidence from passerines as exemplifying evolutionary conservatism in nest type as we do;  
413 however, Hansell (2000) interpreted previous evidence that multiple nest types exist  
414 within several passerine families as supporting evolutionary lability (see also Ligon, 1993),  
415 in arguing against hard constraints on nest type evolution. The number of transitions  
416 across the passerine phylogeny and the higher rates of change in some clades indeed  
417 indicate that there are no hard constraints on nest type evolution, but the substantial  
418 conservatism of passerine nest types (Table 2, Figure 4) stands in contrast to long-standing  
419 assertions that behavioral traits are generally prone to rapid evolutionary change (Darwin  
420 1874; Blomberg *et al.* 2003). Further, such conservatism provides evidence that the time  
421 that most lineages have spent using any of the three nest types is adequate to enable  
422 extensive adaptive refinement of related life history traits (Lack 1947, 1954; Snow 1978;  
423 Martin & Li 1992; Bosque & Bosque 1995; Martin 1995; Auer *et al.* 2007; Barve & Mason  
424 2015), egg color (Oniki 1985; Weidinger 2001), or other phenotypes under selection  
425 pressures that consistently differ by nest type.

426 Our ancestral state reconstructions indicate that all three nest types were  
427 represented in early passerine lineages (Figure 1), in accord with Collias (1997) and Price  
428 and Griffiths (2017). Because all three nest types were present in the early passerine  
429 lineages, Collias (1997) was skeptical that the nest type of the most recent common  
430 ancestor of the passerines could be known. Indeed, in both maximum likelihood and  
431 maximum parsimony reconstructions, the nest type state of the MRCA of the passerines  
432 represented in our phylogenetic tree is ambiguous. It is reconstructed as either cavity or  
433 dome-nesting in the maximum likelihood reconstruction (Figure 1), with open cup nesting

434 secondarily evolved. In the maximum parsimony reconstruction, we achieve no resolution  
435 in the reconstruction of the MRCA among the three types (Supplementary Figure 1).  
436 However, even had we found an unambiguous reconstruction for the MRCA of crown  
437 Passeriformes in this analysis, skepticism is warranted for such reconstructions, as the  
438 extinction of even a single species in the early history of a clade can greatly affect the  
439 reconstructed states. That said, our maximum likelihood reconstructions agree with those  
440 of Price and Griffiths (2017) that open cup nesting is a derived state with respect to the  
441 crown Passeriformes, despite being the most common passerine nest type. Together with  
442 the macroecological patterns, which highlight the degree to which open cup nests are  
443 utilized across latitudinal and elevational gradients, these results raise the issue of why the  
444 open cup nest has become the most prevalent nest type. Further, they raise the question of  
445 how open-cup nesting clades have colonized a broader spectrum of environments than  
446 hole- and dome-nesting clades, including high-latitude and high-elevation areas, despite  
447 comparatively less protection from heat loss, exposure to sun and rain, and predation.

448

#### 449 *Nest type prevalence along latitudinal and elevational gradients*

450 If roofed nests have thermoregulatory benefits via reduced heat loss rates in cold  
451 environments, we should observe a greater prevalence of these nests at high latitudes, and  
452 at high elevation in the tropics. Our macroevolutionary evidence suggests that such a  
453 pattern, if it existed, would result from greater success of roofed-nesting lineages in the  
454 colonization of cold environments. However, the combination of the latitudinal and  
455 elevational patterns of species ranges do not provide substantial evidence that roofed nests  
456 aid lineages in the colonization of cold environments. The patterns are more clear for  
457 dome-nesting species than hole-nesting species. We find, in agreement with previous  
458 authors (Collias & Collias 1984; Martin *et al.* 2017), that dome-nesting species are more  
459 limited to the tropics than either hole-nesting or cup-nesting species, and that dome-  
460 nesting species make up a greater proportion of species diversity in the subtropical and  
461 temperate southern hemisphere than the northern hemisphere (e.g. Supplementary Figure  
462 2). Our analyses add an important additional insight regarding the ranges of dome-nesting  
463 species: they are no more prevalent at high elevation than at low elevations within the  
464 Neotropics. Indeed, our analyses of the evolution of dome-nesting provide limited support

465 for a negative relationship between dome-nesting and elevation – that is, our analyses  
466 show that evolutionary transitions to dome-nesting may be more likely at lower elevations.  
467 Whatever thermoregulatory benefits come from using a domed nest, these benefits have  
468 not resulted in transitions to dome nests in cold environments, or disproportionately  
469 predisposed lineages using domed nests to successful colonization of and diversification  
470 within colder environments. Our analyses instead reinforce the degree to which dome-  
471 nesting species are concentrated in the lowland tropics (Figure 3b). Thermoregulatory  
472 advantages may be important to other aspects of dome-nesting passerine biology, such as  
473 permitting longer durations of off-nest activities during incubation because of lower rates  
474 of cooling (Martin et al., 2017). The importance of such an advantage would seem to be  
475 lowest, however, in the lowland tropics, where cooling of eggs and nestlings is slow  
476 because of ambient temperatures. It is also possible that the roof's benefits may come from  
477 shielding nest contents from sun or rain exposure (Snow 1978), two likely challenges for  
478 nesting birds in the lowland tropics, and especially for birds that spend long periods of time  
479 away from the nest (White & Kinney 1974; Deeming & Gray 2016).

480 The distribution of dome-nesting species along latitudinal and elevational gradients  
481 is consistent with the hypothesis that higher predation risk in the lowland tropics renders  
482 dome-nesting a more successful strategy there than elsewhere. This interpretation  
483 assumes that predation risk has consistently been higher at lower latitudes (Skutch 1966,  
484 1985; Snow 1978) and lower elevations (Boyle, 2008; Jankowski et al., 2013; Skutch, 1985)  
485 over evolutionary time, that the domed-nesting habit results in reduced nest predation  
486 rates compared to the open cup-nesting habit (Hall *et al.* 2015; Martin *et al.* 2017), and that  
487 a tradeoff exists that renders dome-nesting less advantageous at higher latitudes, despite  
488 its advantages with respect to predation. The first two of these assumptions appear  
489 plausible based on the results of existing studies (but see Martin et al. 2017), while the  
490 third has not, to our knowledge, been studied. With respect to the predation benefits of  
491 domed nests, Martin et al. (2017) focused on the inconsistency in the outcome of predation  
492 rate comparisons between open cup and domed nests. However, of ten within-site  
493 predation rate comparisons for open cup versus domed nests presented by Martin et al.  
494 (2017), nine yield higher predation rate estimates for open cup nests than domed nests  
495 (although not all nine of these within-site differences are statistically significant).



496           The distributions of hole-nesting species, and the relative prevalence of hole-nesting  
497 across latitude and elevation, are less clear. Compared with the dome-nesting species, hole-  
498 nesting species are less restricted to low latitudes, with their relative prevalence highest at  
499 mid-latitudes. Their relative prevalence does not correspond with the expectations of  
500 either the predation or thermoregulation hypotheses. Predation rates are lower in hole  
501 nests than in domed nests (Auer *et al.* 2007), so the relative benefits of protection from  
502 predation for hole-nesting should be strongest where predation rates are highest – at low  
503 latitude and low elevation – yet hole nests do not have their greatest prevalence there.  
504 Predation rates may also be higher in the southern hemisphere than the northern  
505 hemisphere (Martin 1996), but hole-nesting species diversity declines much more steeply  
506 with latitude in the southern than the northern hemisphere (Supplementary Figure 3),  
507 counter to predictions for the distribution of hole-nesting species from the predation  
508 hypothesis.

509           Local diversities of hole-nesting species may be limited by the availability of suitable  
510 nest sites, via limits on population densities (Newton 1998; Cockle *et al.* 2010). We might  
511 expect the greatest availability of hole-nesting sites in vast lowland forests like the Amazon  
512 and Congo basins, where there are so many trees in various stages of decay. Why do hole-  
513 nesting passerine species not have greater prevalence in the lowland tropics, then? One  
514 potential explanation is competition for cavities with non-excavating, non-passerine  
515 species like parrots and trogons (Brightsmith 2005) – clades that are largely confined to  
516 the tropics and sub-tropics. Thus, the mid-latitude peak in hole-nesting passerines may in  
517 part be explained by a competition gradient for nest sites from non-passerines. An  
518 alternative explanation is that tropical tree cavities decay or are colonized by parasites  
519 more quickly, such that the number of cavities in these forests is far greater than the  
520 number of suitable nest cavities (Löhmus & Remm 2005; Cockle *et al.* 2010).

521

#### 522 *Body size evolution in association with nest type*

523           Our analyses of body mass evolution across latitude revealed an unexpected  
524 pattern: hole-nesting species become smaller at higher latitudes (Table 3, Fig. 4), but not at  
525 higher elevations. In our PGLM, the expected body mass for hole-nesting passerines is ~40  
526 g at the equator, and ~18 g at 50° latitude. The relationship between body mass and

527 latitude in hole-nesting species is counter to Bergmann's rule *sensu lato*, which has some  
528 support across birds more generally (Olson *et al.* 2009). However, we do not recover any  
529 evidence for a similar decline in body mass with elevation in hole-nesting species.  
530 Meanwhile, our analyses predict that body mass in equatorial dome-nesting species is just  
531 36% of the body mass in equatorial hole-nesting species. The difference between these  
532 values is higher in the tropics than outside the tropics. Indeed, despite dome-nesting  
533 species generally having smaller mass than either hole- or open cup- nesting species,  
534 consistent with previous studies (Collias & Collias, 1984; Martin *et al.*, 2017), the predicted  
535 values for hole-nesting and dome-nesting species converge at high latitudes (Figure 4).

536 Life history aspects correlated with the hole-nesting habit may help explain these  
537 patterns. Hole nesting is associated with longer developmental periods (Martin & Li 1992).  
538 Further, developmental periods increase with body mass in passerines (Bosque & Bosque  
539 1995). Thus, large-bodied hole-nesting species should generally have long developmental  
540 periods, with smaller-bodied hole-nesting species having shorter developmental periods.  
541 The length of the breeding season, meanwhile, decreases with increasing latitude (Ricklefs  
542 1966; Barve & Mason 2015), but likely does not decrease with elevation to the same  
543 degree, if at all. It is therefore possible that large-bodied hole-nesting species cannot  
544 sustain population growth at high latitudes, resulting in a filtering of hole-nesting species  
545 by developmental time at higher latitudes, whereas no such filtering is evident at higher  
546 elevations. Short breeding seasons could limit the prospects for re-nesting following  
547 failure, or multiple clutches, which could limit population growth and hence colonization of  
548 high latitudes by larger hole-nesting species. Importantly, this argument relies on  
549 conservatism in life history traits associated with hole nesting, and a failure for local  
550 adaptation to drive faster development of hole-nesting species at higher latitudes. This  
551 issue requires further investigation. We note, however, that the short development times of  
552 open cup-nesting species might explain, in part, why open cup-nesting species dominate at  
553 the extreme high end of the latitude spectrum (Figure 2) where breeding seasons should be  
554 shortest.

555  
556 **Acknowledgements**

557 This work was funded in part by National Science Foundation grants DBI-1458034 and  
558 DEB-1208428, and by the University of Florida.

559

560 **Table 1: AIC scores for evolutionary transition models in nesting type and**  
561 **gregariousness (see Methods).**

562

|                                  | AIC     | $\Delta$ AIC |
|----------------------------------|---------|--------------|
| <b><i>Nesting behavior</i></b>   |         |              |
| <b>All rates different</b>       | 2120.65 | 0            |
| <b>Equal rates</b>               | 2203.72 | 83.07        |
| <b>Symmetric</b>                 | 2204.08 | 83.43        |
| <b>Symmetric hidden and open</b> | 2205.45 | 84.80        |

563

564

565 **Table 2: Evolutionary transition rates between nesting states from the ARD (all-**  
566 **rates-different) model for nesting behavior states. Overall transition rates are low**  
567 **(see Fig. 1). Estimated transition rates to open cup nesting from either cavity or**  
568 **dome nesting were greater than the reverse.**

569

| Transition             | Estimated rate ( $\pm$ SE) |
|------------------------|----------------------------|
| <b>cup -&gt; hole</b>  | 0.001238 $\pm$ .0001945    |
| <b>dome -&gt; hole</b> | 0.00186 $\pm$ .0004542     |
| <b>hole -&gt; cup</b>  | 0.01039 $\pm$ .001095      |
| <b>dome -&gt; cup</b>  | 0.004109 $\pm$ .0005852    |
| <b>hole -&gt; dome</b> | 0.006875 $\pm$ .0009814    |
| <b>cup -&gt; dome</b>  | 0.003192 $\pm$ .0002882    |

570

571

572

573

574

575

576

577

578

579

580

581

582

583

584

585

586

587

588 **Table 3: Model selection for generalized linear models analyzing the probability of**  
 589 **evolving different nest types across the passerines (n = 2,754 species), with latitude**  
 590 **and log body mass as predictors.**

| Response variable     | Predictors                                    | AIC             |
|-----------------------|-----------------------------------------------|-----------------|
| Prob (cup-nesting)    | centroid latitude, log body mass, interaction | 1497.147        |
| Prob (cup-nesting)    | centroid latitude, log body mass              | 1416.523        |
| Prob (cup-nesting)    | centroid latitude                             | 1420.480        |
| Prob (cup-nesting)    | log body mass                                 | 1370.852        |
| Prob (cup-nesting)    | none (intercept only)                         | <b>1368.844</b> |
| Prob (dome-nesting)   | centroid latitude, log body mass, interaction | 1379.635        |
| Prob (dome-nesting)   | centroid latitude, log body mass              | 1478.349        |
| Prob (dome-nesting)   | centroid latitude                             | 1231.565        |
| Prob (dome-nesting)   | log body mass                                 | 1193.085        |
| Prob (dome-nesting)   | none (intercept only)                         | <b>1191.040</b> |
| Prob (cavity-nesting) | centroid latitude, log body mass, interaction | 872.7737        |
| Prob (cavity-nesting) | centroid latitude, log body mass              | 857.2534        |
| Prob (cavity-nesting) | centroid latitude                             | 865.0302        |
| Prob (cavity-nesting) | log body mass                                 | 855.4775        |
| Prob (cavity-nesting) | none (intercept only)                         | <b>853.1694</b> |

591 **Table 4: Model selection for generalized linear models analyzing the probability of**  
 592 **evolving different nest types for neotropical passerines (n = 846 species).**  
 593

| Response variable   | Predictors                                     | AIC             |
|---------------------|------------------------------------------------|-----------------|
| Prob (cup-nesting)  | Log mean elevation, log body mass,             | 499.2075        |
| Prob (cup-nesting)  | Log mean elevation, log body mass              | 502.0388        |
| Prob (cup-nesting)  | Log mean elevation                             | <b>496.1432</b> |
| Prob (cup-nesting)  | log body mass                                  | 497.729         |
| Prob (cup-nesting)  | none (intercept only)                          | 496.2275        |
| Prob (dome-nesting) | Log mean elevation, log body mass, interaction | 472.7101        |
| Prob (dome-nesting) | Log mean elevation, log body mass              | 468.0592        |
| Prob (dome-nesting) | Log mean elevation                             | <b>466.2324</b> |
| Prob (dome-nesting) | log body mass                                  | 467.7962        |
| Prob (dome-nesting) | none (intercept only)                          | 467.2081        |
| Prob (hole-nesting) | Log mean elevation, log body mass, interaction | 293.4847        |
| Prob (hole-nesting) | Log mean elevation, log body mass              | 285.4204        |
| Prob (hole-nesting) | Log mean elevation                             | 283.4731        |
| Prob (hole-nesting) | log body mass                                  | 283.4706        |
| Prob (hole-nesting) | none (intercept only)                          | <b>281.1440</b> |

594 **Table 5: Coefficient estimates and uncertainty for preferred phylogenetic**  
 595 **generalized linear models of the probability of evolutionary transition to open cup-**  
 596 **and dome-nesting respectively.  $\alpha$  is the rate of change in the continuous trait in the**  
 597 **Brownian motion threshold model used in the model. It was not possible to estimate**  
 598 **confidence intervals on the intercept (estimate =  $-0.7439$ , SE =  $1.4840$ , alpha =  $7.80 \times$**   
 599  **$10^{-3}$ ) of the cavity-nesting model.**

| Response variable | $\alpha$ | Coefficient          | Estimate | SE    | Lower CI | Upper CI |
|-------------------|----------|----------------------|----------|-------|----------|----------|
| Open cup-nesting  | 0.0103   | Intercept            | -.621    | 1.24  | -1.54    | .0567    |
|                   |          | Log median elevation | .0282    | .0373 | -.0249   | .0748    |
| Dome-nesting      | 0.0123   | Intercept            | -.264    | 1.10  | -.828    | .212     |
|                   |          | Log median elevation | -.0322   | .0401 | -.104    | .0153    |

600  
601  
602  
603  
604

**Table 6: Model selection for generalized linear models analyzing the evolution of log body mass across the passerines (n = 2,848 species), with nest type and absolute latitude as predictors.**

| Response variable | Predictors                                | AIC             |
|-------------------|-------------------------------------------|-----------------|
| Log body mass     | nest type, absolute latitude, interaction | <b>6636.691</b> |
| Log body mass     | nest type, absolute latitude              | 6660.258        |
| Log body mass     | nest type                                 | 6667.255        |
| Log body mass     | absolute latitude                         | 6864.154        |
| Log body mass     | none (intercept only)                     | 6863.386        |
| Log body mass     | nest type, log mean elevation,            | 888.6484        |
| Log body mass     | nest type, log mean elevation             | 885.0993        |
| Log body mass     | nest type                                 | 883.2454        |
| Log body mass     | log mean elevation                        | 883.0425        |
| Log body mass     | none (intercept only)                     | <b>881.1852</b> |

605  
606  
607  
608  
609  
610

## References

611 Baiser, B., Valle, D., Zelazny, Z. & Burleigh, J.G. (2017). Non-random patterns of

- 612 invasion and extinction reduce phylogenetic diversity in island bird assemblages.  
613 *Ecography (Cop.)*.
- 614 Barve, S. & Mason, N.A. (2015). Interspecific competition affects evolutionary links  
615 between cavity nesting, migration and clutch size in Old World flycatchers  
616 (Muscicapidae). *Ibis (Lond. 1859)*., 157, 299–311.
- 617 Blomberg, S.P., Garland, T. & Ives, A.R. (2003). Testing for phylogenetic signal in  
618 comparative data: behavioral traits are more labile. *Evolution (N. Y.)*., 57, 717–745.
- 619 Bosque, C. & Bosque, M.T. (1995). Nest predation as a selective factor in the evolution  
620 of developmental rates in altricial birds. *Am. Nat.*, 145, 234–260.
- 621 Boyle, W.A. (2008). Can variation in risk of nest predation explain altitudinal migration in  
622 tropical birds? *Oecologia*, 155, 397–403.
- 623 Brightsmith, D.J. (2005). Competition, predation and nest niche shifts among tropical  
624 cavity nesters : Phylogeny and natural history evolution of parrots (Psittaciformes)  
625 and trogons (Trogoniformes). *Oikos*, 36, 64–73.
- 626 Burleigh, J.G., Kimball, R.T. & Braun, E.L. (2015). Building the avian tree of life using a  
627 large-scale, sparse supermatrix. *Mol. Phylogenet. Evol.*, 84, 53–63.
- 628 Buttemer, W.A., Astheimer, L.B., Weathers, W.W. & Hayworth, A.M. (1987). Energy  
629 savings attending winter-nest use by Verdins (*Auriparus flaviceps*). *Auk*, 104, 531–  
630 535.
- 631 Calder, W.A. (1983). Ecological scaling: mammals and birds. *Annu. Rev. Ecol. Syst.*.,  
632 14, 213–230.
- 633 Clements, J.F., Schulenberg, T.S., Iliff, M.J., Sullivan, B.L., Wood, C.L. & Roberson, D.  
634 (2011). *The Clements checklist of birds of the world, Version 6.6*.
- 635 Cockle, K.L., Martin, K. & Drever, M.C. (2010). Supply of tree-holes limits nest density  
636 of cavity-nesting birds in primary and logged subtropical Atlantic forest. *Biol.*

- 637           *Conserv.*, 143, 2851–2857.
- 638   Collias, N.E. (1964). The evolution of nests and nest-building in birds. *Am. Zool.*, 175–  
639           190.
- 640   Collias, N.E. (1997). On the origin and evolution of nest building by passerine birds.  
641           *Condor*, 99, 253–270.
- 642   Collias, N.E. & Collias, E.C. (1984). *Nest building and bird behavior*. Princeton  
643           University Press.
- 644   Darwin, C. (1874). The descent of man. *Prometh. Books, New York, ed, 2*, 1874.
- 645   Deeming, D.C. & Gray, L.A. (2016). Incubation attentiveness and nest insulatory values  
646           correlate in songbirds. *Avian Biol. Res.*, 9, 32–36.
- 647   Drummond, A.J. & Rambaut, A. (2007). BEAST: Bayesian Evolutionary Analysis by  
648           Sampling Trees. *BMC Evol. Biol.*, 7, 214.
- 649   Drury, J.P. & Burroughs, N. (2015). Nest shape explains variation in sexual  
650           dichromatism in New World blackbirds. *J. Avian Biol.*, 47, 312–320.
- 651   Dunning, J.B. (2008). *Body Masses of Birds of the World*. Taylor and Francis Group,  
652           Boca Raton, Florida.
- 653   Dunning, J.B.J. (2015). <https://ag.purdue.edu/fnr/Documents/WeightBookUpdate.pdf>.  
654           Available at: <https://ag.purdue.edu/fnr/Documents/WeightBookUpdate.pdf>. Last  
655           accessed .
- 656   von Haartman, L. (1957). Adaptation in hole-nesting birds. *Evolution (N. Y.)*, 11, 339–  
657           347.
- 658   Hall, Z.J., Street, S.E., Auty, S. & Healy, S.D. (2015). The coevolution of building nests  
659           on the ground and domed nests in Timaliidae. *Auk*, 132, 584–593.
- 660   Hansell, M. (2000). *Bird nests and construction behaviour*. Cambridge University Press.

- 661 Harmon, L.J., Weir, J.T., Brock, C.D., Glor, R.E. & Challenger, W. (2008). GEIGER:  
662 investigating evolutionary radiations. *Bioinformatics*, 24, 129–131.
- 663 Ho, L. & Ane, C. (2014). A linear-time algorithm for Gaussian and non-Gaussian trait  
664 evolution models. *Syst. Biol.*, 63, 397–408.
- 665 del Hoyo, J., Elliott, A., Sargatal, J., Christie, D.A. & de Juana, E. (2015). *Handbook of*  
666 *the Birds of the World Alive*.
- 667 Irestedt, M., Fjeldså, J. & Ericson, P.G.P. (2006). Evolution of the ovenbird-  
668 woodcreeper assemblage (Aves: Furnariidae)-major shifts in nest architecture and  
669 adaptive radiation. *J. Avian Biol.*, 37, 260–272.
- 670 Jankowski, J.E., Londoño, G.A., Robinson, S.K. & Chappell, M.A. (2013). Exploring the  
671 role of physiology and biotic interactions in determining elevational ranges of  
672 tropical animals. *Ecography (Cop.)*, 36, 1–12.
- 673 Janzen, D.H. (1967). Why Mountain Passes are Higher in Tropics. *Am. Nat.*, 101, 233-.
- 674 Kendeigh, S.C. (1961). Energy of birds conserved by roosting in cavities. *Wilson Bull.*,  
675 73, 140–147.
- 676 Kern, M.D. & Van Riper III, C. (1984). Altitudinal variations in nests of the Hawaiian  
677 honeycreeper *Hemignathus virens virens*. *Condor*, 443–454.
- 678 Kulesza, G. (1990). An analysis of clutch-size in New World passerine birds. *Ibis (Lond.*  
679 *1859)*, 132, 407–422.
- 680 Lack, D. (1947). The significance of clutch-size. *Ibis (Lond. 1859)*, 89, 302–352.
- 681 Lack, D. (1954). *The natural regulation of animal numbers*. *Nat. Regul. Anim. Numbers*.  
682 Clarendon Press., Oxford.
- 683 Lamprecht, I. & Schmolz, E. (2004). Thermal investigations of some bird nests.  
684 *Thermochim. Acta*, 415, 141–148.



- 685 Ligon, J.D. (1993). The role of phylogenetic history in the evolution of contemporary  
686 avian mating and parental care systems. In: *Current ornithology*. Springer, pp. 1–  
687 46.
- 688 Linder, E.T. & Bollinger, E.K. (1995). Depredation of artificial Ovenbird nests in a forest  
689 patch. *Wilson Bull.*, 107, 169–174.
- 690 Löhmus, A. & Remm, J. (2005). Nest quality limits the number of hole-nesting  
691 passerines in their natural cavity-rich habitat. *Acta Oecologica*, 27, 125–128.
- 692 Londoño, G.A., Chappell, M.A., Jankowski, J.E. & Robinson, S.K. (2017). Do  
693 thermoregulatory costs limit altitude distributions of Andean forest birds? *Funct.*  
694 *Ecol.*, 31, 204–215.
- 695 Mainwaring, M.C. & Hartley, I.R. (2013). The energetic costs of nest building in birds.  
696 *Avian Biol. Res.*, 6, 12–17.
- 697 Martin, T.E. (1993). Nest predation and nest sites. *Bioscience*, 43, 523.
- 698 Martin, T.E. (1995). Avian life history evolution in relation to nest sites, nest predation,  
699 and food. *Ecol. Monogr.*, 65, 101–127.
- 700 Martin, T.E. (1996). Life history evolution in tropical and south temperate birds: What do  
701 we really know? *J. Avian Biol.*, 27, 263–272.
- 702 Martin, T.E., Boyce, A.J., Fierro-Calderón, K., Mitchell, A.E., Armstad, C.E., Mouton,  
703 J.C., *et al.* (2017). Enclosed nests may provide greater thermal than nest predation  
704 benefits compared with open nests across latitudes. *Funct. Ecol.*, 31, 1231–1240.
- 705 Martin, T.E. & Li, P. (1992). Life history traits of open- vs. cavity-nesting birds. *Ecology*,  
706 73, 579–592.
- 707 Mason, P. (1985). The nesting biology of some passerines of Buenos Aires, Argentina.  
708 *Ornithol. Monogr.*, 954–972.
- 709 NatureServe, B.I. and. (2014). *Bird species distribution maps of the world*. BirdLife

- 710 International and Natureserve, Cambridge, UK and Arlington, USA.
- 711 Newton, I. (1998). *Population limitation in birds*. Academic Press.
- 712 Nice, M.M. (1957). Nesting success in altricial birds. *Auk*, 74, 305–321.
- 713 Olson, V.A., Davies, R.G., Orme, C.D.L., Thomas, G.H., Meiri, S., Blackburn, T.M., et  
714 al. (2009). Global biogeography and ecology of body size in birds. *Ecol. Lett.*, 12,  
715 249–259.
- 716 Oniki, Y. (1979). Is nesting success of birds low in the tropics? *Ornithol. Monogr.*, 11,  
717 60–69.
- 718 Oniki, Y. (1985). Why robin eggs are blue and birds build nests. *Ornithol. Monogr.*, 536–  
719 545.
- 720 Pagel, M. (1994). Detecting correlated evolution on phylogenies: a general method for  
721 the comparative analysis of discrete characters. *Proc. R. Soc. B*, 255, 37–45.
- 722 Paradis, E., Claude, J. & Strimmer, K. (2004). APE: Analyses of Phylogenetics and  
723 Evolution in R language. *Bioinformatics*, 20, 289–290.
- 724 Price, J.J. & Griffith, S.C. (2017). Open cup nests evolved from roofed nests in the early  
725 passerines. In: *Proc. R. Soc. B*. The Royal Society.
- 726 Reuter, H.I., Nelson, A. & Jarvis, A. (2007). An evaluation of void-filling interpolation  
727 methods for SRTM data. *Int. J. Geogr. Inf. Sci.*, 21, 983–1008.
- 728 Revell, L.J. (2012). phytools: an R package for phylogenetic comparative biology (and  
729 other things). *Methods Ecol. Evol.*, 3, 217–223.
- 730 Ricklefs, R.E. (1966). The temporal component of diversity among species of birds.  
731 *Evolution (N. Y.)*, 20, 235–242.
- 732 Ricklefs, R.E. (1969). An analysis of nesting mortality in birds. *Smithson. Contrib. to*  
733 *Zool.*, 9, 1–48.

- 734 Sanderson, M.J. (2003). R8s: Inferring absolute rates of molecular evolution and  
735 divergence times in the absence of a molecular clock. *Bioinformatics*, 19, 301–302.
- 736 Skutch, A.F. (1961). The nest as a dormitory. *Ibis (Lond. 1859)*., 103, 50–70.
- 737 Skutch, A.F. (1966). A breeding bird census and nesting success in Central America.  
738 *Ibis (Lond. 1859)*., 108, 1–16.
- 739 Skutch, A.F. (1985). Clutch size, nesting success, and predation on nests of Neotropical  
740 birds, reviewed. *Ornithol. Monogr.*, 26, 575–594.
- 741 Snow, D.W. (1978). The nest as a factor determining clutch-size in tropical birds. *J.*  
742 *Ornithol.*, 119, 227–230.
- 743 Studer, A. (1994). Analysis of nest success in Brazilian birds. *J. Fur Ornithol.*, 135, 298.
- 744 Wallace, A.R. (1868). A theory of birds' nests: showing the relation of certain sexual  
745 differences of colour in birds to their mode of nidification. *J. Travel Nat. Hist.*, 1, 73–  
746 89.
- 747 Weidinger, K. (2001). Does egg colour affect predation rate on open passerine nests?  
748 *Behav. Ecol. Sociobiol.*, 49, 456–464.
- 749 White, F.N. & Kinney, J.L. (1974). Avian incubation. *Science (80- )*., 186, 107–115.
- 750 Zyskowski, K. & Prum, R.O. (1999). Phylogenetic analysis of the nest architecture of  
751 Neotropical ovenbirds (Furnariidae). *Auk*, 891–911.

752

753

754

755

756

## Figure 1 legend

A stochastic reconstruction of nesting behavior across the passerine phylogeny under the all-rates-different (ARD) model detailed in Table 2, including 3,122 species as tips in the phylogeny (a subtree of the Burleigh et al. 2015 maximum likelihood phylogeny). Note that transitions are relatively rare, with many large clades dominated by a single nest type. Pie charts at nodes indicate posterior probabilities for each nesting types at all nodes where the maximum posterior probability for any nest type was  $< 0.9$ . Note that the ancestral nesting state for birds is reconstructed as either domed or cavity (see Price and Griffiths 2017).

## Figure 1

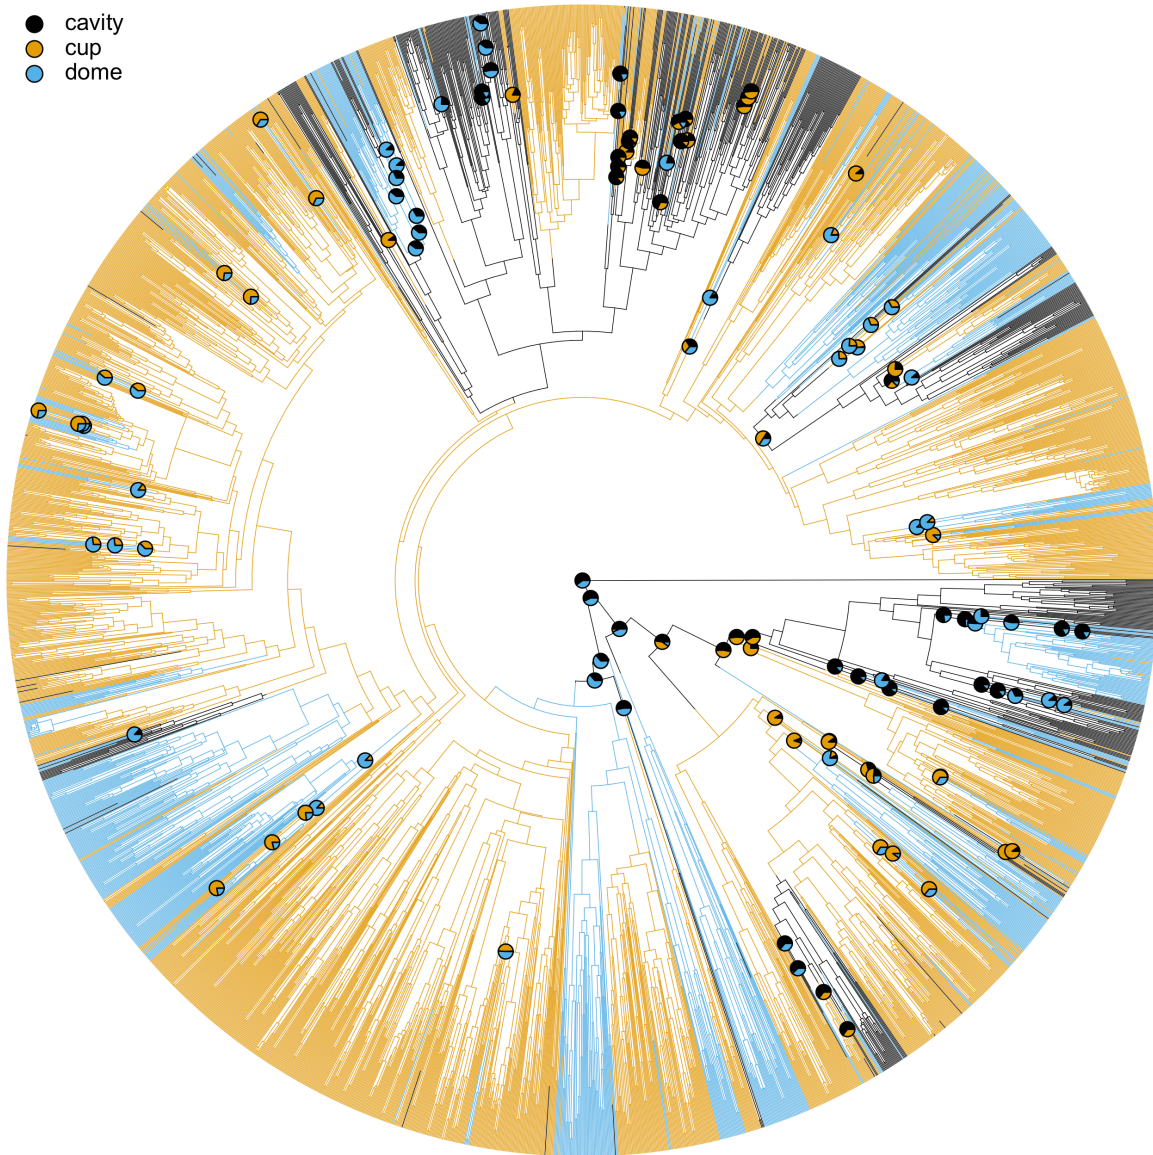

## Figure 2 legend

**a.** Proportions of species range centroids by latitude among 2,754 passerine species. The centroids falling within each latitudinal interval are used to calculate these proportions. **b.** Histogram showing the number of species range centroids for each nest type within latitudinal intervals.

### Figure 2a

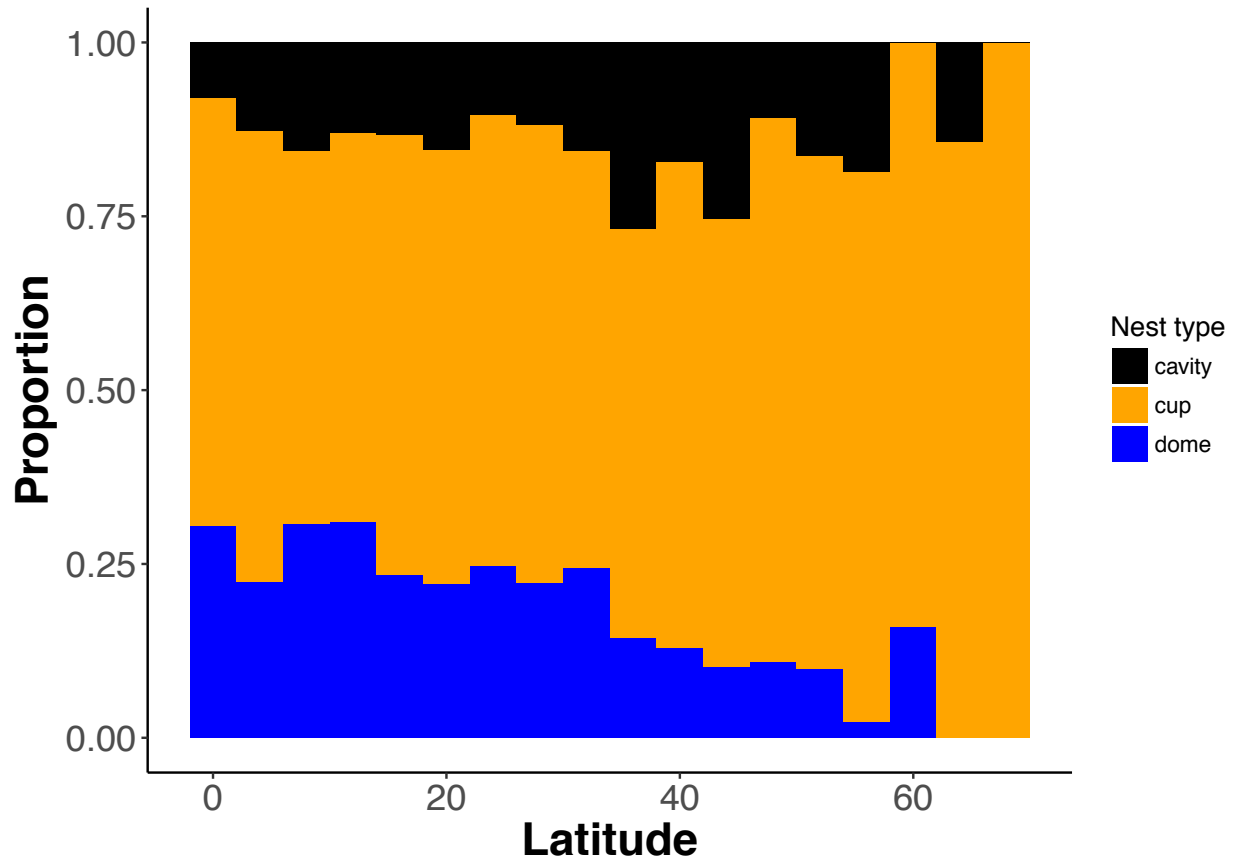

Figure 2b

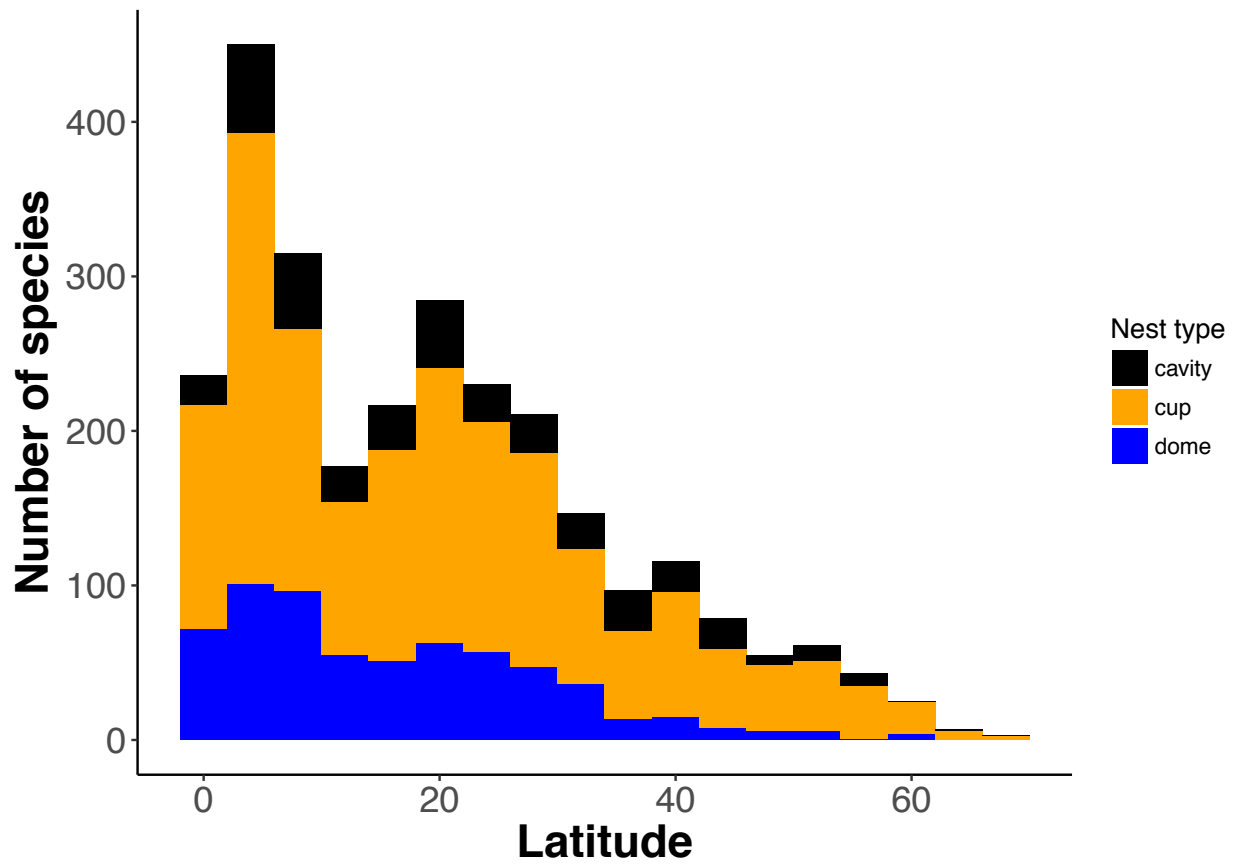

### Figure 3 legend

- a.** Proportions of species range centroids by elevation among 874 Neotropical passerine species. The centroids falling within each interval are used to calculate these proportions.
- b.** Histogram showing the number of species range centroids for each nest type within intervals.

Figure 3a

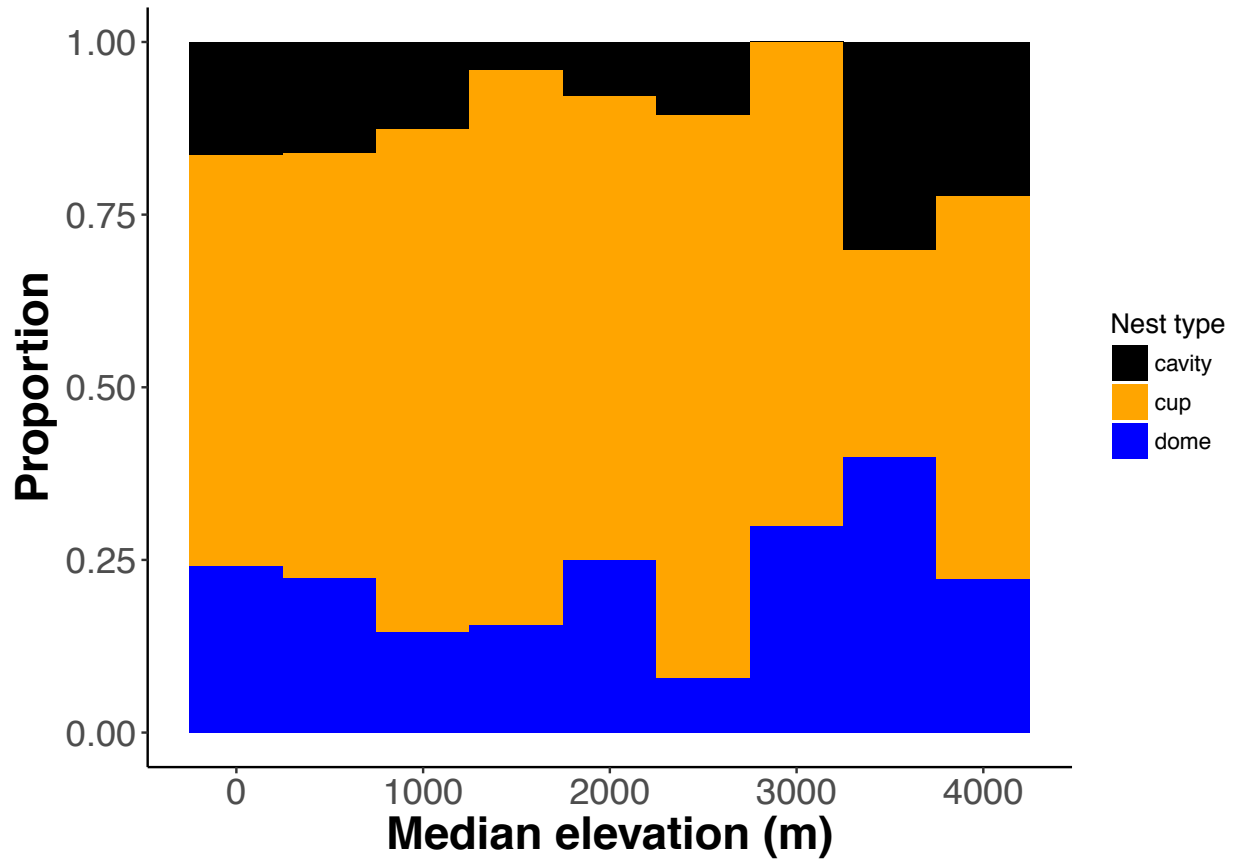

**Figure 3b**

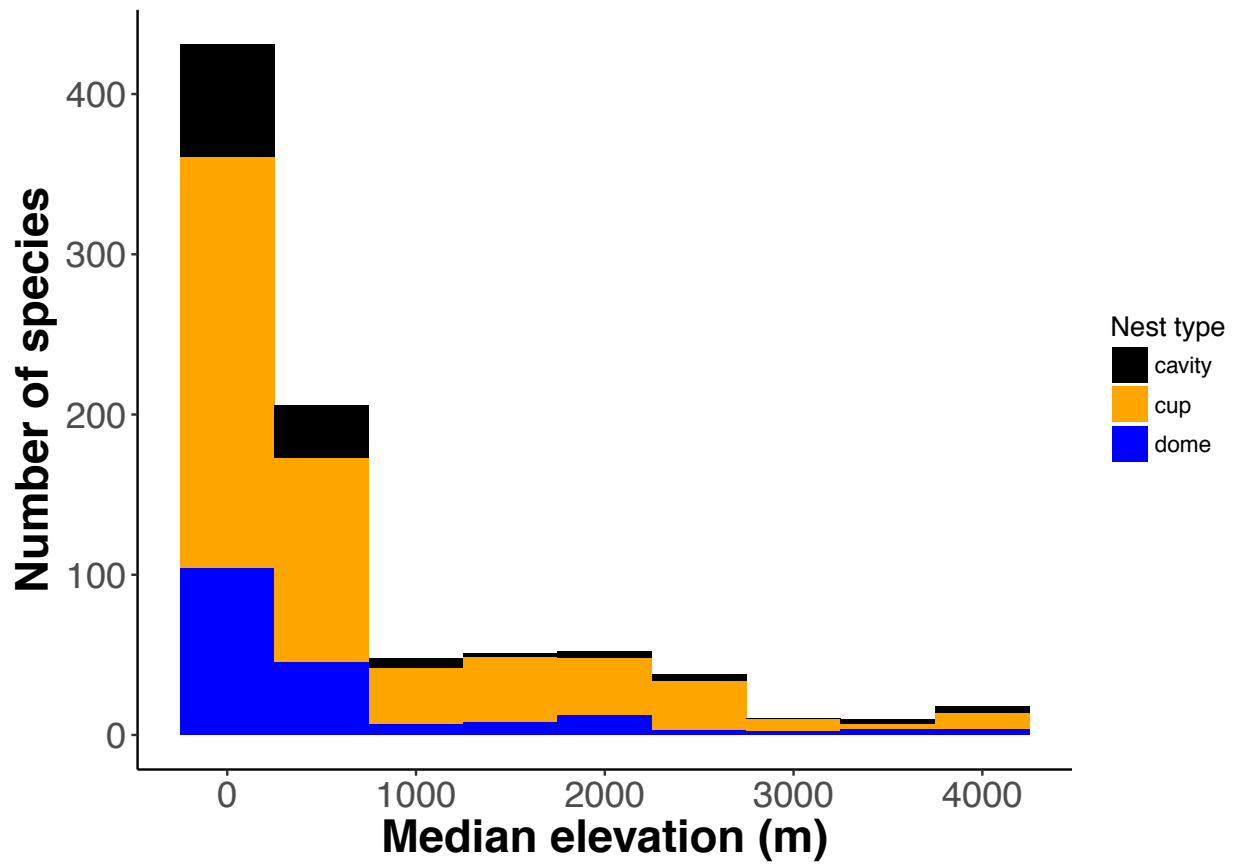



### Figure 4 legend

Patterns of log body mass across latitude by nest type for 2,754 species of passerine birds. Lines are predictions from phylogenetic generalized linear models, and are made irrespective of phylogenetic position of the data. Points are colored by time to most recent nest type transition) as estimated from a maximum likelihood ancestral state reconstruction for the PGLM data set. To estimate these times, we found the most recent node with a posterior probability <0.5 for a nest type different than the tip state for the species.

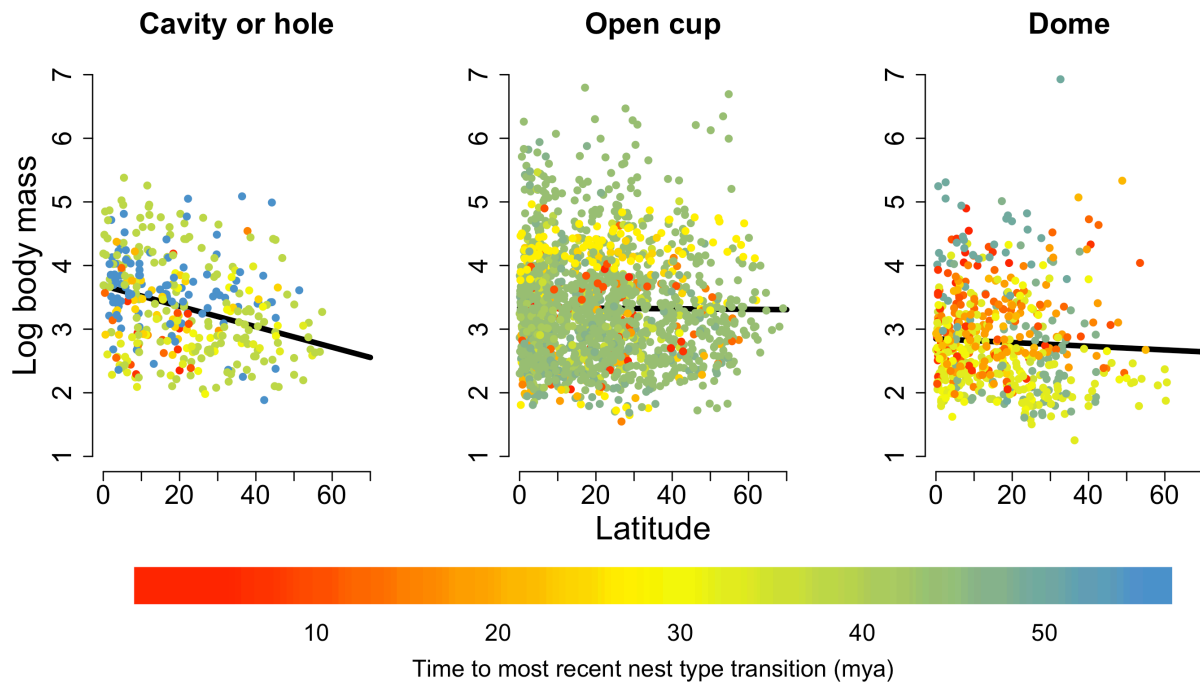

Source: https://www.biorxiv.org/content/10.1101/360958v1.full.pdf
